# Supplementary material for: Significant soil degradation is associated with intensive vegetablecropping in subtropical area: A case study in southwest China
Source: Copernicus journal article supplement (doi:10.5194/soil-2021-17), 2021-03-08
Supplement: Supplementary file [file soil-2021-17-AC5-supplement.pdf]

## Cover Letter

Jun. 1<sup>st</sup>, 2021

Dear Prof. García-Orenes,

Thank you for processing our manuscript entitled “**Significant soil degradation is associated with intensive vegetable cropping in subtropical area: A case study in southwest China**” (soil-2021-17) quickly. We appreciate the comments/suggestions from you and the reviewer on our paper.

We have revised the manuscript carefully, addressing all your and reviewer’s comments and suggestions. Details of revision are given below. We also made a few minor edits in the manuscript to improve the language.

All changes made in the revised manuscript are done in Track Changes to make reviewing easy. We believe that the revised manuscript is much improved and is suitable for publication.

Thank you again and look forward to hearing from you soon.

Yours sincerely,

Dunyi Liu

College of Resources and Environment, Southwest University

Tiansheng Road, Chongqing 400716, China

Tel: 023-68251082; E-mail: [liudy1989@swu.edu.cn](mailto:liudy1989@swu.edu.cn)
